# Supplementary material for: The TYK2-P1104A Autoimmune Protective Variant Limits Coordinate Signals Required to Generate Specialized T Cell Subsets
Source: PubMed Central journal article supplement (PMC6355696; doi:10.3389/fimmu.2019.00044), 2019-01-25
Supplement: Data_Sheet_1.pdf [file Data_Sheet_1.pdf]

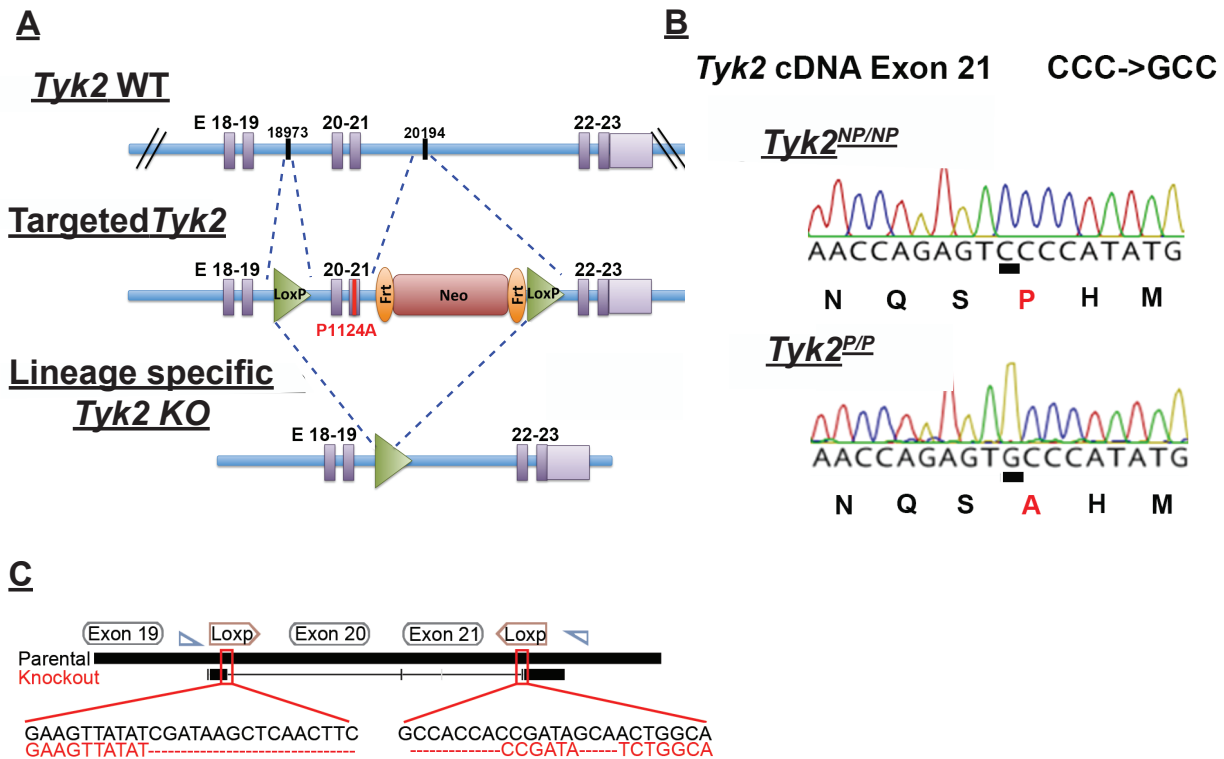

**Supplementary Figure 1. Generation of *Tyk2*<sup>P1124A</sup> and *Tyk2*<sup>-/-</sup> murine models.**

(A) Strategy for generating the *Tyk2*<sup>P</sup> knock-in mice with introduction of the point mutation within exon 21 of *Tyk2* designed to introduce the protective variant allele. Also shown are location of neomycin cassette with flanking FRT sites and the location of *LoxP* sites introduced in order to permit generation of lineage-specific *Tyk2* deletion via intercrossing with cre-expressing strains. (B) DNA sequencing reaction showing the *Tyk2* coding change from CCC (Pro) to GCC (Ala) in homologous knock-in (*Tyk2*<sup>P/P</sup>) mice. (C) DNA sequencing reaction showing the *Tyk2* coding change at *LoxP* sites *Tyk2*<sup>P/P</sup> (Parental) to *Tyk2*<sup>-/-</sup> (Knockout) introduced by crossing the knock-in mice to CMV-cre expressing mice to create a global knockout within the same genetic background.

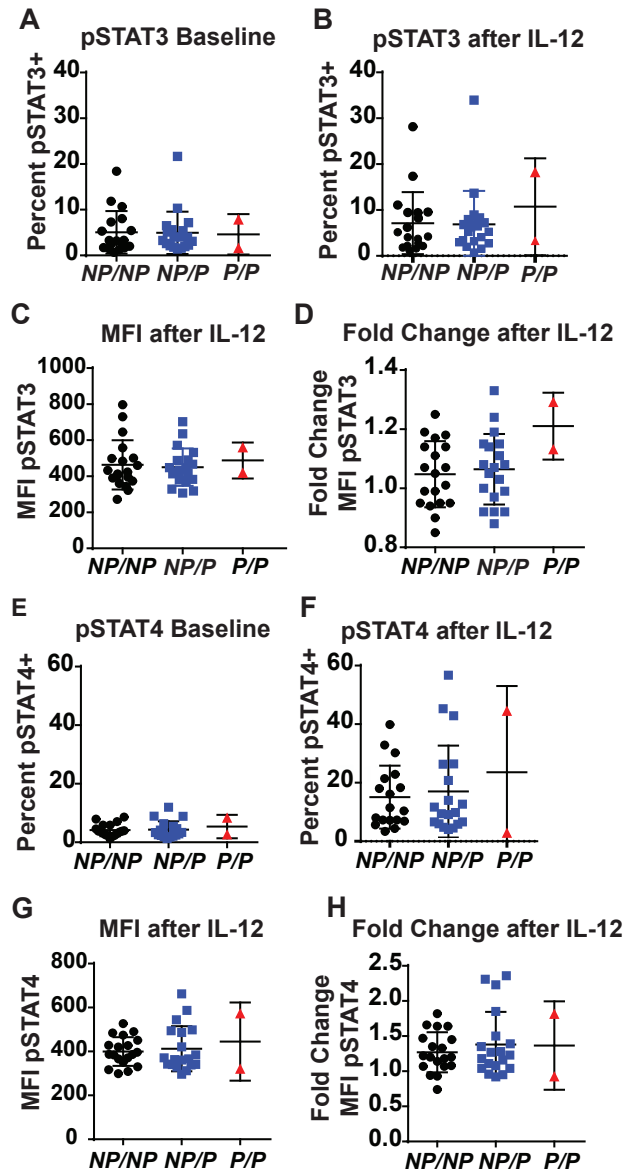

**Supplementary Figure 2. TYK2<sup>P</sup> does not alter IL-12 signaling in human CD4 memory T cells.** Preactivated PBMC from subjects with *TYK2*<sup>NP/NP</sup> (NP/NP), *TYK2*<sup>NP/P</sup> (NP/P), and *TYK2*<sup>P/P</sup> (P/P) were thawed and stimulated with 2.5 ng/ml of IL-12 or left unstimulated for 30 minutes. CD4<sup>+</sup>CD45RA<sup>-</sup> memory T cells were assessed by flow cytometry for: **(A)** proportion of pSTAT3 at baseline and **(B)** in response to IL-12. **(C)** pSTAT3 mean fluorescence intensity (MFI) after IL-12. **(D)** Fold change of pSTAT3 MFI from baseline in response to IL-12 stimulation. **(E)** Frequency of pSTAT4 at baseline and **(F)** and in response to IL-12. **(G)** pSTAT4 MFI after IL-12. **(H)** Fold change of pSTAT4 MFI from baseline in response to IL-12 stimulation. Each symbol represents an individual donor **(A-H)**; small horizontal lines indicate the mean ( $\pm$  s.d.). Data from a combined total of n=19 *TYK2*<sup>NP/NP</sup> donors, n=19 *TYK2*<sup>NP/P</sup> donors, and n=2 *TYK2*<sup>P/P</sup> donors.

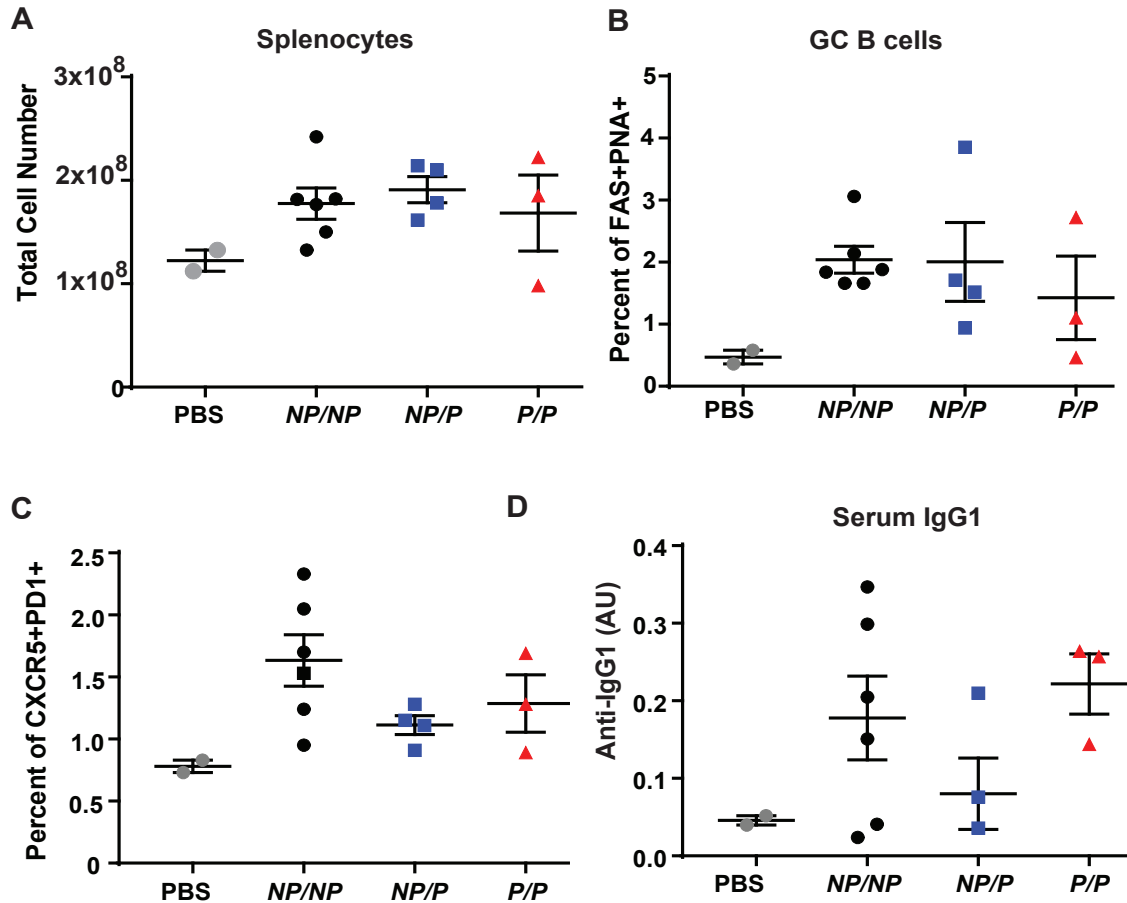

**Supplementary Figure 3. Tfh and GC B cell formation *in vivo* in response to immunization with sheep red blood cells is not impacted by *Tyk2<sup>P</sup>* expression.** (A-C) *Tyk2<sup>NP/NP</sup>* (NP/NP), *Tyk2<sup>NP/P</sup>* (NP/P), *Tyk2<sup>P/P</sup>* (P/P) or *Tyk2<sup>-/-</sup>* (KO) mice were immunized i.p. with 20% by volume of sheep red blood cells (SRBC) or PBS. *Tyk2<sup>NP/NP</sup>* and *Tyk2<sup>NP/P</sup>* mice were used for PBS controls. Splenocytes and serum were collected at Day 5 post-immunization and analyzed for: (A) Total splenocyte cell numbers; (B) frequency of GC B cells (B220+FAS+PNA+ cells); (C) frequency of Tfh cells (CD4<sup>+</sup>CXCR5<sup>+</sup>PD1<sup>+</sup> cells); (D) ELISA for IgG1 antibody (dilution of 31250). Each symbol represents an individual biological replicate; small horizontal lines indicate the mean (± s.e.m.). Data shown are from one of two independent experiments. Statistical analysis was performed using one-way ANOVA with Tukey's multiple comparisons test (A-C).

Supplementary Table 1

| Experiment                   | Control                                                       |                       | Protective                                                    |                       | Figure      |
|------------------------------|---------------------------------------------------------------|-----------------------|---------------------------------------------------------------|-----------------------|-------------|
|                              | Protein                                                       | Genotype Nomenclature | Protein                                                       | Genotype Nomenclature |             |
| Primary Human PBMCs          | TYK2 <sup>Val362/Phe362</sup> TYK2 <sup>Pro1104/Pro1104</sup> | TYK2 <sup>NP/NP</sup> | TYK2 <sup>Val362/Phe362</sup> TYK2 <sup>Pro1104/Ala1104</sup> | TYK2 <sup>NP/P</sup>  | Figure 1    |
|                              |                                                               |                       | TYK2 <sup>Phe362/Phe362</sup> TYK2 <sup>Ala1104/Ala1104</sup> | TYK2 <sup>P/P</sup>   |             |
| <i>In vitro</i> Murine cells | TYK2 <sup>Pro1124/Pro1124</sup>                               | TYK2 <sup>NP/NP</sup> | TYK2 <sup>Pro1124/Ala1124</sup>                               | TYK2 <sup>NP/P</sup>  | Figure 2    |
|                              |                                                               |                       | TYK2 <sup>Ala1124/Ala1124</sup>                               | TYK2 <sup>P/P</sup>   |             |
|                              |                                                               |                       | TYK2 <sup>-/-</sup>                                           | KO                    |             |
| <i>In vivo</i> Murine model  | TYK2 <sup>Pro1124/Pro1124</sup>                               | TYK2 <sup>NP/NP</sup> | TYK2 <sup>Pro1124/Ala1124</sup>                               | TYK2 <sup>NP/P</sup>  | Figure 3    |
|                              | TYK2 <sup>Pro1124/Pro1124</sup>                               | PBS                   | TYK2 <sup>Ala1124/Ala1124</sup>                               | TYK2 <sup>P/P</sup>   |             |
| <i>In vivo</i> Murine model  | TYK2 <sup>Pro1124/Pro1124</sup>                               | TYK2 <sup>NP/NP</sup> | TYK2 <sup>Pro1124/Ala1124</sup>                               | TYK2 <sup>NP/P</sup>  | Figure 4A-C |
|                              |                                                               |                       | TYK2 <sup>Ala1124/Ala1124</sup>                               | TYK2 <sup>P/P</sup>   |             |
| <i>In vivo</i> Murine model  | TYK2 <sup>Pro1124/Pro1124</sup>                               | TYK2 <sup>NP/NP</sup> | TYK2 <sup>Pro1124/Ala1124</sup>                               | TYK2 <sup>NP/P</sup>  | Figure 4E-H |
|                              | TYK2 <sup>Pro1124/Pro1124</sup> IL-12R <sup>-/-</sup>         | IL-12R <sup>-/-</sup> | TYK2 <sup>Ala1124/Ala1124</sup>                               | TYK2 <sup>P/P</sup>   |             |
| Primary Human PBMCs          | TYK2 <sup>Val362/Phe362</sup> TYK2 <sup>Pro1104/Pro1104</sup> | TYK2 <sup>NP/NP</sup> | TYK2 <sup>Val362/Phe362</sup> TYK2 <sup>Pro1104/Ala1104</sup> | TYK2 <sup>NP/P</sup>  | Figure 5    |
| Primary Human PBMCs          | TYK2 <sup>Val362/Phe362</sup> TYK2 <sup>Pro1104/Pro1104</sup> | TYK2 <sup>NP/NP</sup> | TYK2 <sup>Val362/Phe362</sup> TYK2 <sup>Pro1104/Ala1104</sup> | TYK2 <sup>NP/P</sup>  | Figure 6A-C |
|                              |                                                               |                       | TYK2 <sup>Phe362/Phe362</sup> TYK2 <sup>Ala1104/Ala1104</sup> | TYK2 <sup>P/P</sup>   |             |
| <i>In vitro</i> Murine cells | TYK2 <sup>Pro1124/Pro1124</sup>                               | TYK2 <sup>NP/NP</sup> | TYK2 <sup>Pro1124/Ala1124</sup>                               | TYK2 <sup>NP/P</sup>  | Figure 6D-E |
|                              |                                                               |                       | TYK2 <sup>Ala1124/Ala1124</sup>                               | TYK2 <sup>P/P</sup>   |             |
|                              |                                                               |                       | TYK2 <sup>-/-</sup>                                           | KO                    |             |
| <i>In vivo</i> Murine model  | TYK2 <sup>Pro1124/Pro1124</sup>                               | TYK2 <sup>NP/NP</sup> | TYK2 <sup>Pro1124/Ala1124</sup>                               | TYK2 <sup>NP/P</sup>  | Figure 7    |
|                              |                                                               |                       | TYK2 <sup>Ala1124/Ala1124</sup>                               | TYK2 <sup>P/P</sup>   |             |
